# Supplementary material for: Controlling O coverage and stability by alloying Au and Ag
Source: Royal Society of Chemistry journal article supplement (doi:10.1039/c6cp05611c), 2016-01-01
Supplement: c6cp05611c1.pdf [file c6cp05611c1.pdf]

# Supporting Information for: Controlling O coverage and stability by alloying Au and Ag

Matthew M. Montemore,<sup>†,‡</sup> Ekin Dogus Cubuk,<sup>‡</sup> J. Eric Klobas,<sup>†</sup> Martin  
Schmid,<sup>†</sup> Robert J. Madix,<sup>‡</sup> Cynthia M. Friend,<sup>†,‡</sup> and Efthimios Kaxiras<sup>\*,¶,‡</sup>

*Department of Chemistry and Chemical Biology, Harvard University, Cambridge, MA  
02138, USA, School of Engineering and Applied Sciences, Harvard University, Cambridge,  
MA 02138, USA, and Department of Physics, Harvard University, Cambridge, MA 02138,  
USA*

E-mail: [kaxiras@physics.harvard.edu](mailto:kaxiras@physics.harvard.edu)

September 8, 2016

---

\*To whom correspondence should be addressed

<sup>†</sup>Department of Chemistry and Chemical Biology, Harvard University, Cambridge, MA 02138, USA

<sup>‡</sup>School of Engineering and Applied Sciences, Harvard University, Cambridge, MA 02138, USA

<sup>¶</sup>Department of Physics, Harvard University, Cambridge, MA 02138, USA

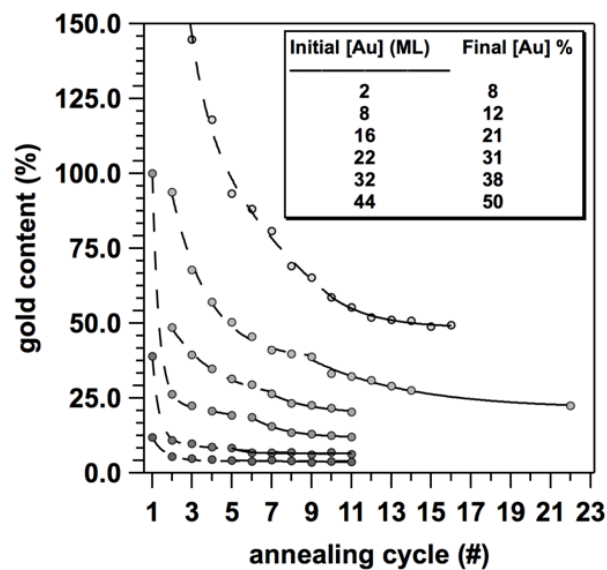

Figure S1: Surface gold concentrations for successive annealings of in situ-generated Au/Ag (110) alloys: alloys were annealed to 630 K (dashed lines); alloys were then exposed to 75000 L dioxygen and annealed to 630 K (solid lines). Note that the figure is scaled to display optimal resolution between experiments and the initial data points of traces 4, 5, and 6 are not displayed.

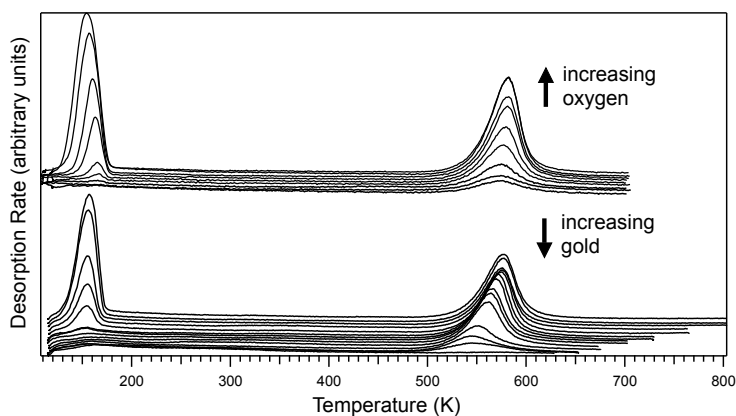

Figure S2: Full traces for TPDs dosed at 125 K.

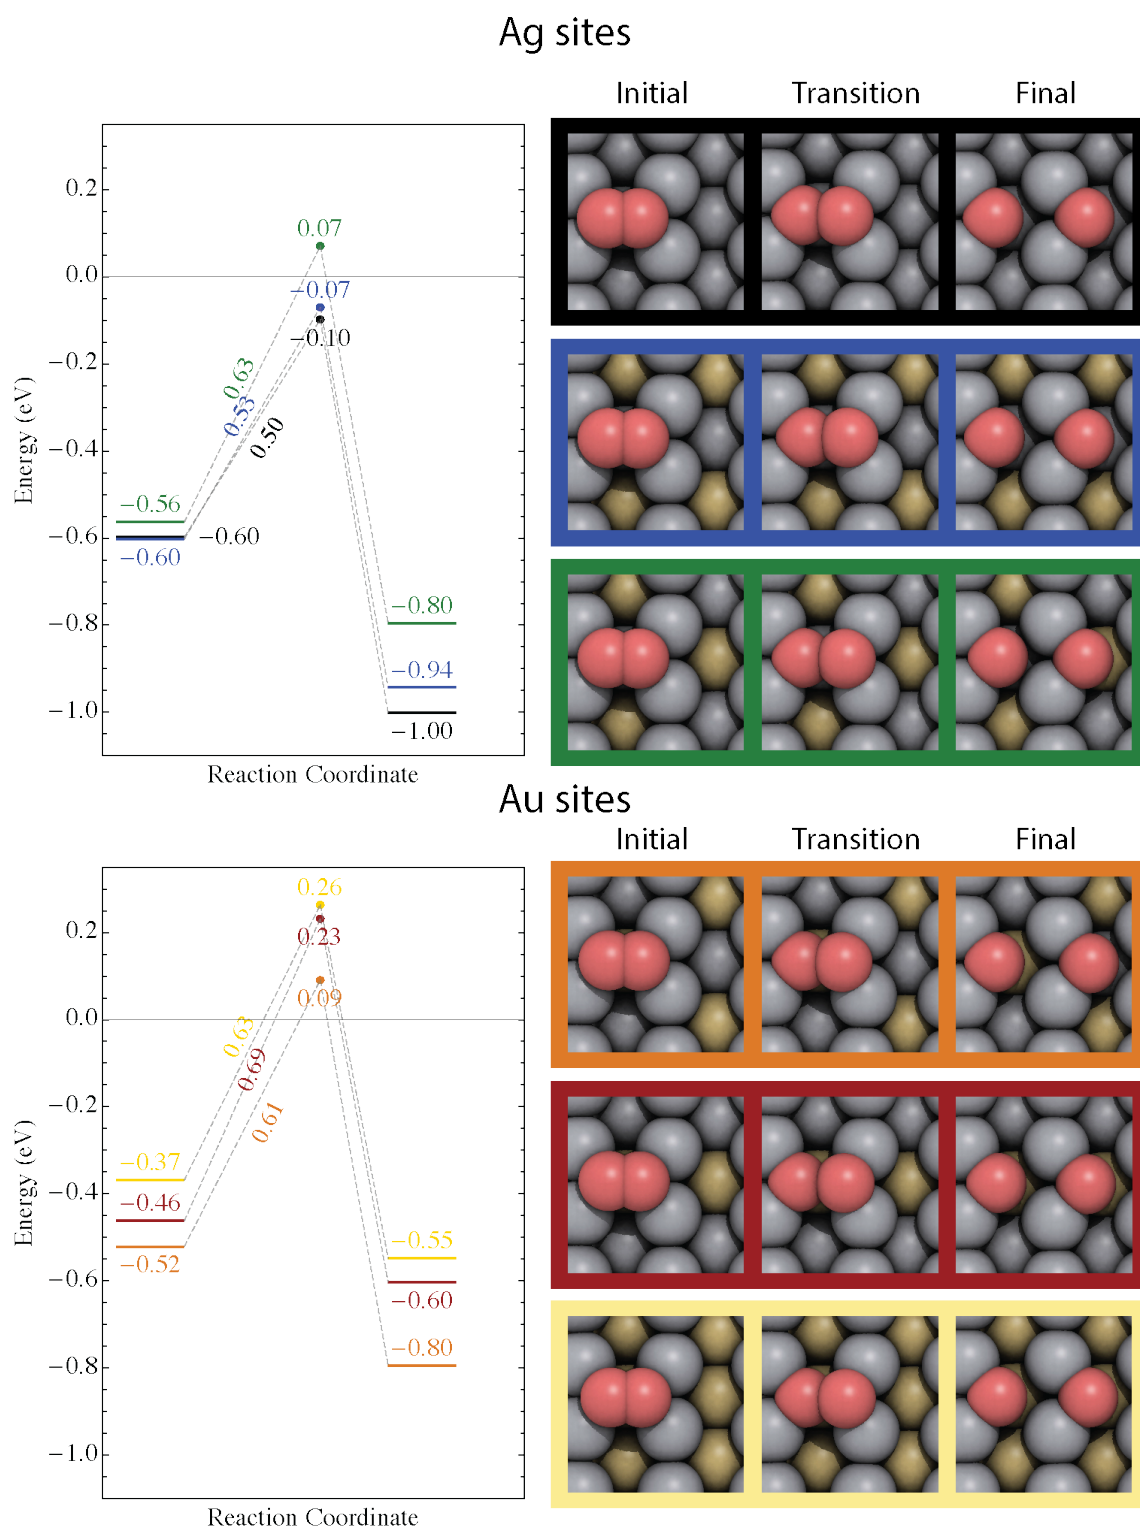

Figure S3: The potential energy surface for each case from DFT, with initial, transition state, and final structures. The Au concentrations are, from top to bottom: 0%, 25%, 25%, 25%, 50%.

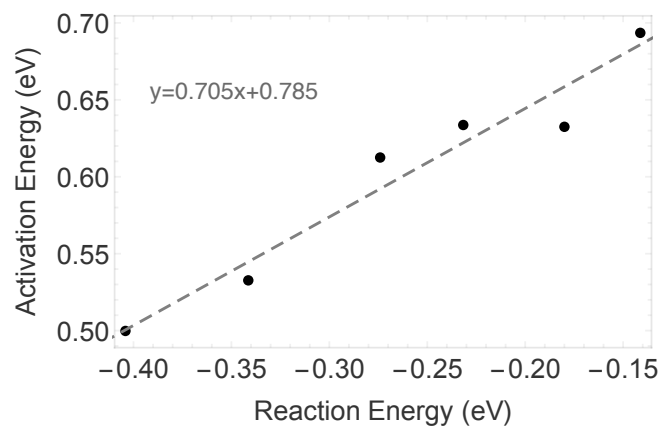

Figure S4: BEP relation for  $O_2$  dissociation on all of the surfaces tested.

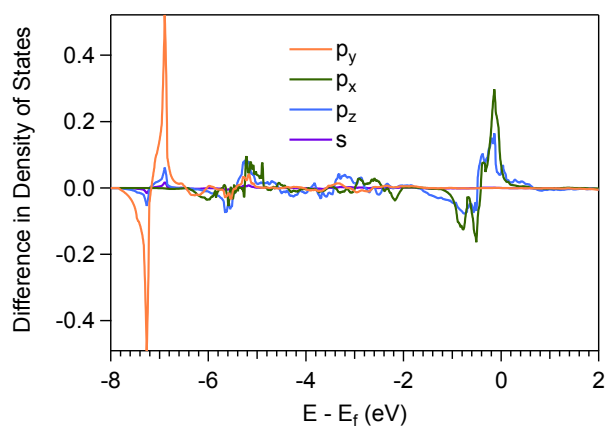

Figure S5: Difference in density of states, projected on an oxygen atom, between  $O_2$  adsorbed on two different AgAu(110) surfaces with different configurations, as shown in the main text. (The configuration with Au atoms aligned in the  $[100]$  direction is subtracted from the configuration where the Au atoms are offset in every other trough.) The O–O axis is along the y-direction. This demonstrates that the Au atom in the next trough interacts with the  $\sigma$ -2p orbital.
